# Supplementary material for: New perspectives for viability studies with high-content analysis Raman spectroscopy (HCA-RS)
Source: PubMed Central journal article supplement (PMC6718400; doi:10.1038/s41598-019-48895-7), 2019-09-02
Supplement: 41598_2019_48895_MOESM1_ESM.pdf [file 41598_2019_48895_MOESM1_ESM.pdf]

## Supplementary Materials:

### New perspectives for viability studies with high-content analysis Raman spectroscopy (HCA-RS)

Abdullah Saif Mondol<sup>1,2</sup>, Natalie Töpfer<sup>1,3</sup>, Jan Rüger<sup>1,2</sup>, Ute Neugebauer<sup>1,2,3</sup>, Jürgen Popp<sup>1,2,3</sup>, and Iwan W. Schie<sup>1</sup>

*1 Leibniz Institute of Photonic Technology and Leibniz Health Technologies, Albert Einstein Str. 9, 07745 Jena, Germany*

*2 Institute of Physical Chemistry and Abbe Center of Photonics, Friedrich-Schiller University Jena, Helmholtzweg 4, 07743 Jena, Germany*

*3 Center of Sepsis Control and Care, Jena University Hospital, Am Klinikum 1, 07747 Jena, Germany*

Corresponding author: [iwan.schie@leibniz-ipht.de](mailto:iwan.schie@leibniz-ipht.de)

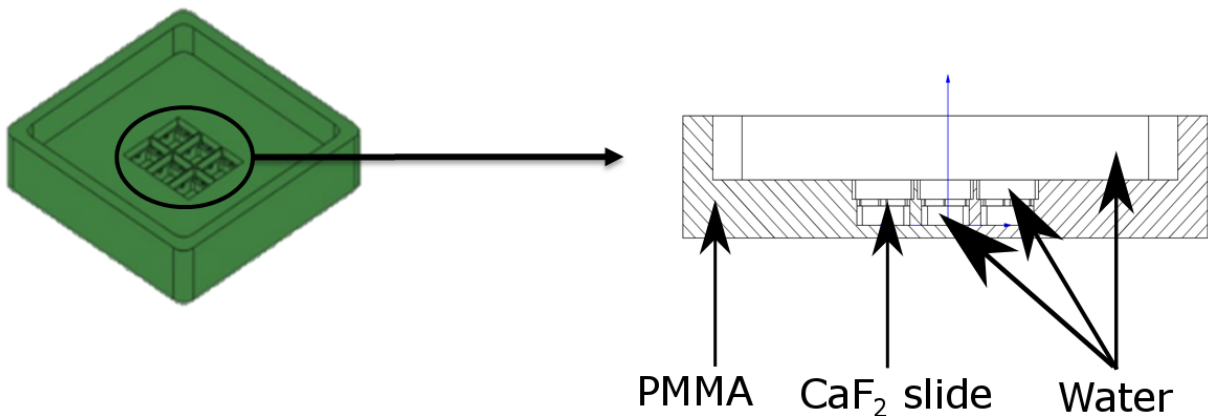

S1: The cross section of the cartridge shows the schematic of the design. It also indicates the position of the CaF<sub>2</sub> slide and the water.

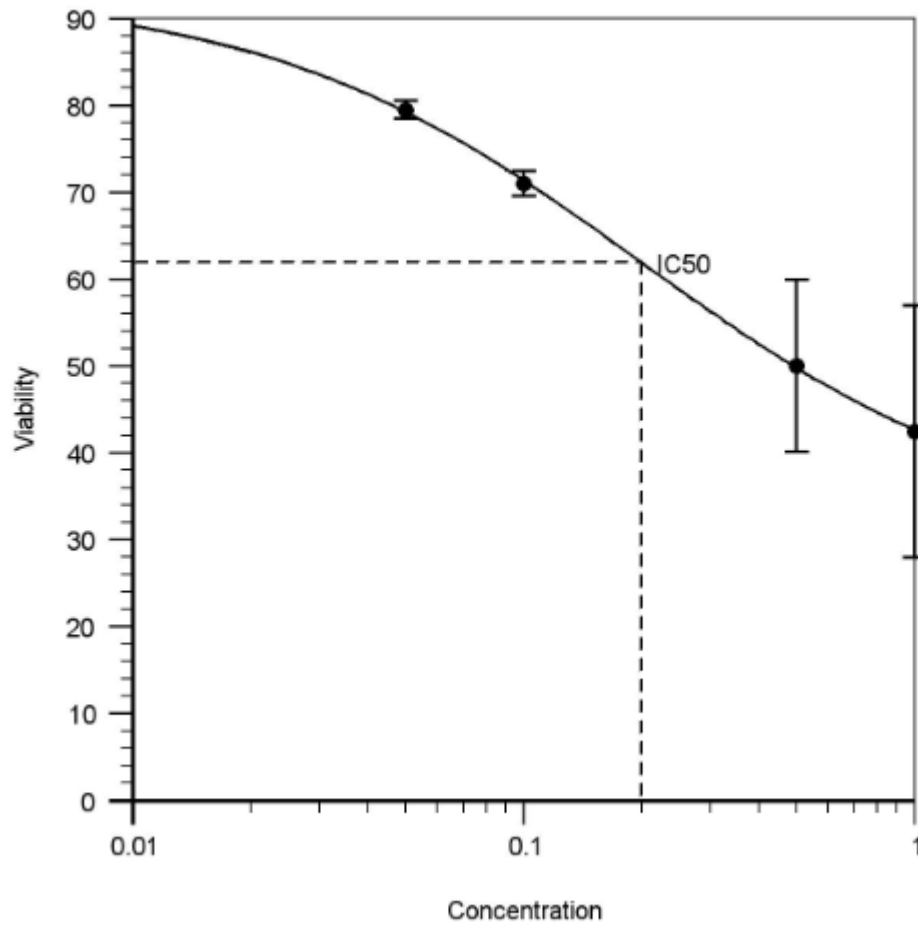

S: The cell viability vs. the DOX concentrations are plotted to calculate the IC<sub>50</sub> value. The formula for the calculation is estimated from <https://www.aatbio.com/tools/ic50-calculator>

and represented as:

$$V = 30.918 + \frac{93.021 - 30.918}{1 + \left(\frac{Conc.}{0.199}\right)^{0.905}}$$

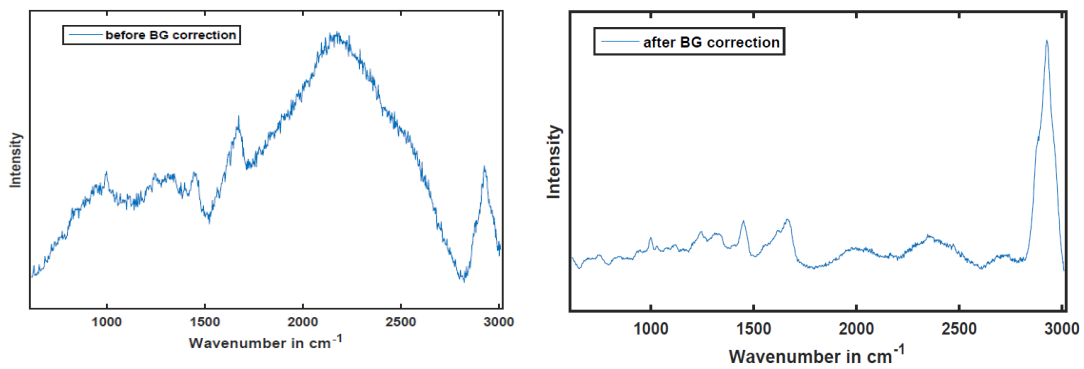

S: Sample acquired spectrum of a 1  $\mu\text{M}$  DOX treated THP-1 cell before (left) and after (right) the background correction using EMSC.
